# Supplementary material
Source: PubMed Central journal article supplement (PMC5987910)
Supplement: Supplementary_Tables.pdf [file Supplementary_Tables.pdf]

**Appendix table 1: Sample Characteristics**

|                         | China | India | Ghana | Mexico | South Africa | Russia |
|-------------------------|-------|-------|-------|--------|--------------|--------|
| <b>Total population</b> | 13367 | 7150  | 4724  | 2306   | 3840         | 3938   |
| <b>Age (mean)</b>       | 62.5  | 61.5  | 64.2  | 63.0   | 61.6         | 63.9   |
| <b>Male (%)</b>         | 49.8  | 51.1  | 49.7  | 46.8   | 44.0         | 38.8   |
| <b>Urban (%)</b>        | 47.6  | 29.3  | 41.0  | 78.8   | 64.9         | 72.7   |
| <b>Wealth (%):</b>      |       |       |       |        |              |        |
| Q1 (the lowest)         | 16.3  | 17.9  | 18.3  | 15.2   | 20.7         | 16.2   |
| Q2                      | 18.1  | 19.3  | 19.3  | 24.7   | 19.9         | 19.5   |
| Q3                      | 20.5  | 18.7  | 20.6  | 16.7   | 18.2         | 19.1   |
| Q4                      | 23.3  | 19.4  | 20.0  | 16.6   | 19.8         | 20.5   |
| Q5 (the highest)        | 21.6  | 24.4  | 21.4  | 26.5   | 21.4         | 24.5   |

## Appendix 2: List of variables

### Effectiveness variables:

- Persons with known HT in the past 12 months with prescribed meds: Have you been taking any medications or other treatment for it during the past 12 months? (Q4061b)
- Controlled hypertension and Undiagnosed hypertension were derived from the blood pressure measurement (Q2501\_s, Q2502\_s, Q2503\_s) and (Q2501\_d, Q2502\_d, Q2503\_d).
- Persons with diagnosed depression in the past 12 months with prescribed meds: Have you been taking any medications or other treatment for it during the last 12 months? (Q4041b)
- Cervical screening coverage in the past three years: The last time you had the pelvic examination, did you have a PAP smear test? (Q4079)
- Breast screening coverage in the past three years: When was the last time you had a mammography, if ever? (Q4080)
- Eye examination in the past three years: When was the last time you had your eyes examined by a medical professional? (Q2020)
- Special diet / weight control for diabetes: Have you been following a special diet, exercise regime or weight control program for diabetes during the last 2 weeks? (Q4024)
- Operation if have cataracts: In the last 5 years, have you had eye surgery to remove this cataract(s)? (Q4063)
- Medications or treatment from a dentist in past 12 months: Have you received any medications or treatment from a dentist or other oral health specialist during he last 12 months? (Q4068b)

Cost variables:

- Type of spending as a percentage of outpatient and inpatient out of pocket expenditure (provider fees, medicines, test, transport, other):  
Thinking about your last visit, how much did you or your household pay for health care provider's fees (Q5033A), medicines (Q5033B), tests (Q5033C), transport (Q5033D), other (Q5033E).  
Thinking about your last [hospital] stay, how much did you or your family/household members pay out- of-pocket for: health care provider's fees (Q5011A), medicines (Q5011B), tests (Q5011C), transport (Q5011D), other (Q5011E).
- Percentage of last outpatient/inpatient visit that was free (Q5032\_8).

Access variables:

- Getting healthcare when needed (outpatient): The last time you needed health care, did you get health care? (Q5002)
- Cost as a barrier to getting healthcare: Which reason(s) best explains why you did not get health care? (Q5003b\_01 & Q5003b\_03)
- Hospital stays in the past 3 years: In the last 3 years, have you ever stayed overnight in a hospital or a long-term facility? (Q5005)
- Time to get to a hospital: About how long did it take you to get there? (Q5009a)
- Outpatient visits in the past 12 months: Over the last 12 months, did you receive any health care NOT including an overnight stay in hospital or long-term care facility? (Q5026)
- Time to get to the outpatient facility: About how long did it take you to

get there? (Q5031)

- In the last 3 years, have you ever stayed overnight in a hospital or long-term care facility? (Q5005)
- In total, how many times did you receive health care or consultation in the last 12 months? (Q5027)

*Patient centeredness (both inpatient and outpatient):*

- Prompt attention from the provider: the amount of time you waited before being attended to? (Q5018 & Q5039)
- Being treated with respect: your experience of being treated respectfully? (Q5019 & Q5040)
- Clarity of communication with the provider: how clearly health care providers explained things to you? (Q5020 & Q5041)
- Involvement in decision-making: your experience of being involved in making decisions for your treatment? (Q5021 & Q5042)
- Confidentiality: the way the health services ensured that you could talk privately to providers? (Q5022 & Q5043)
- Provider choice: the ease with which you could see a health care provider you were happy with? (Q5023 & Q5044)
- Facility cleanliness: the cleanliness in the health facility? (Q5024 & Q5045)
- Satisfaction: Overall, how satisfied were you with the care you received during your last [hospital] stay? (Q5013 & Q5034)
- Improvement of condition: What was the outcome of your visit to the health care provider? Did your condition....? (Q5014 & Q5035)

- Getting the expected outcome: Was this the outcome or result you had expected? (Q5015 & Q5036)
